# Supplementary material
Source: Springer Nature journal article supplement (https://www.springermedizin.de/resource/supplementary/13011_2011_244_MOESM2_ESM.pdf/9628656)
Supplement: MOESM2 [file 9628656]

**N = 6,527**

**Subset to 3,988 ( $3,988/6527 = 61\%$ )**

Clients that received METCBT5 in an outpatient setting, with 3-month follow-up treatment data and were due for a 6-month follow-up

**$3,988 - (1,028 = 2,244, 135+389) = 2,464$**

Clients who had 0 sessions or were missing no. of sessions recorded for the length of treatment variable (S7e4\_3) were excluded.  
**(N for Table 1)**

**$2,244 - (105+244) = 2,115$**

Clients who were not discharged or left ASA/AMA (Against Staff Advice/Against Medical Advice) were excluded  
**(N for Table 2)**

**$2,115 - 62 = 2,053$**

Those who were missing data for GISS (n=60) and race (n=2) were excluded.

**Final Analytic N for discharge to the community analysis = 2,053**  
**(N for Table 3)**
